# Supplementary material for: Heterologous Biosynthesis of Artemisinin in Chrysanthemum morifolium Ramat
Source: MDPI journal article supplement (doi:10.3390/separations8060075), 2021-05-28
Supplement: s1 [file s1]

## Supplementary Materials

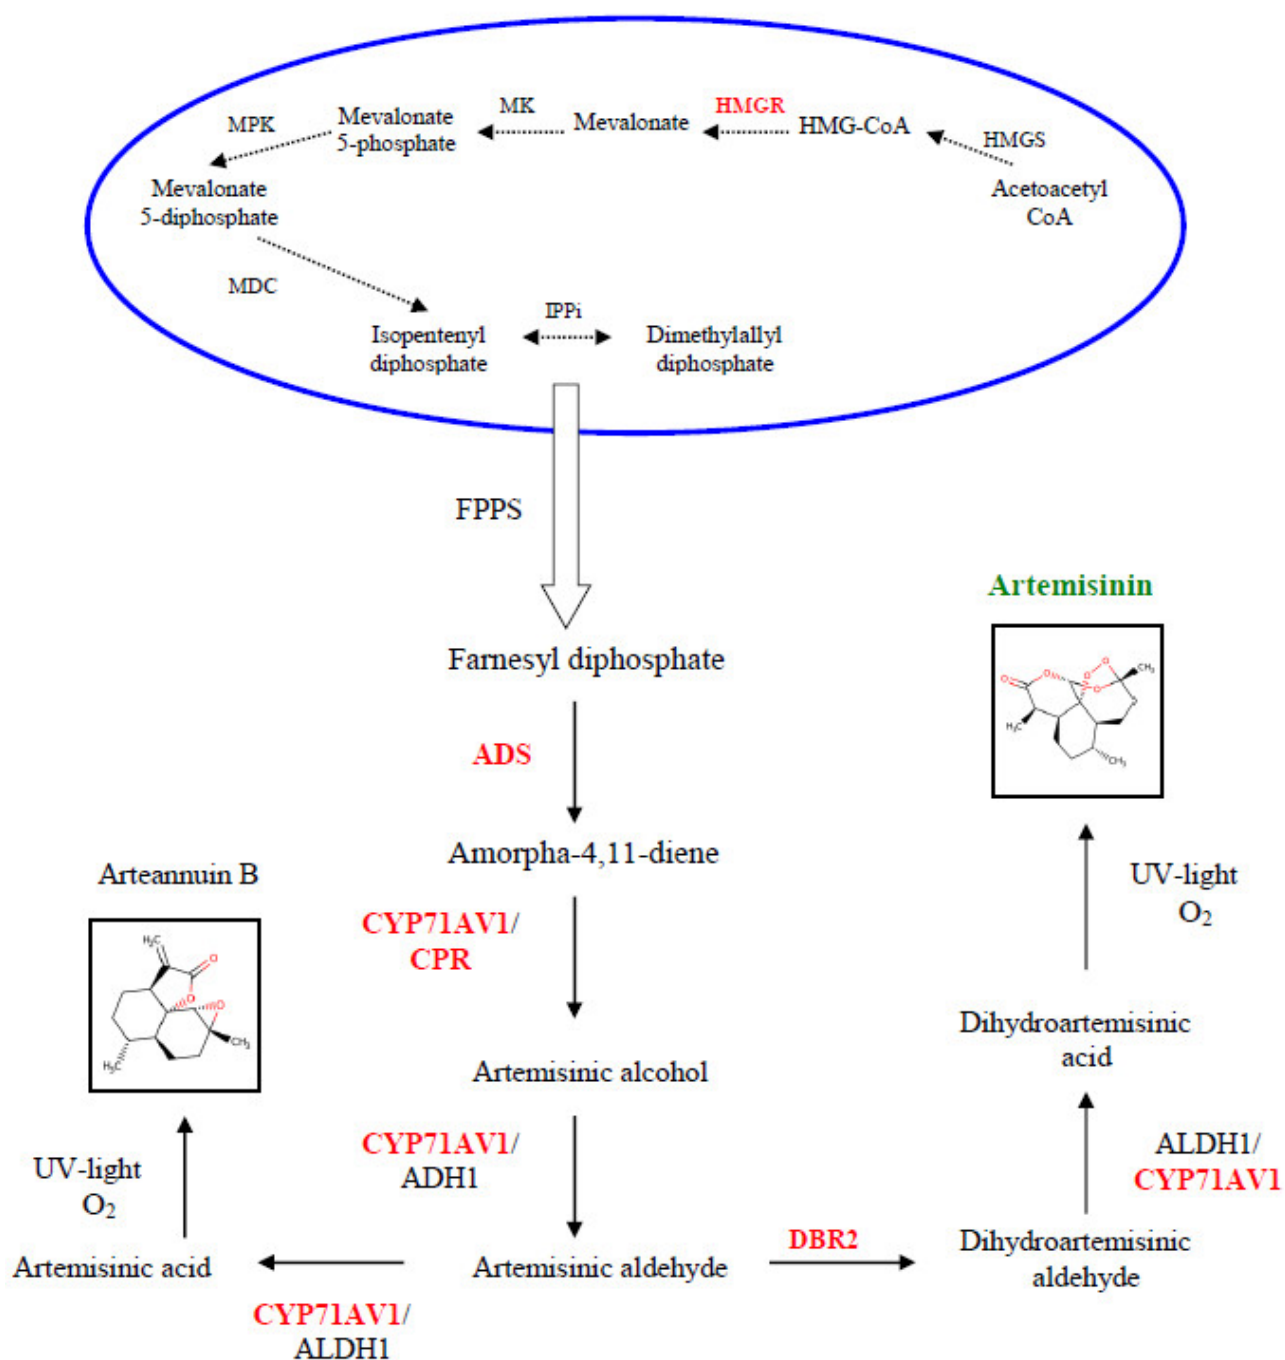

**Figure S1.** Biosynthetic pathway of artemisinin. The mevalonic acid (MVA) pathway is shown in a blue frame. Artemisinin pathway: ADS - amorpha-4,11-diene synthase; CYP71AV1 - amorpha-4,11-diene monooxygenase; CPR - cytochrome P450 reductase; ADH1 - alcohol dehydrogenase; DBR2 - artemisinic aldehyde  $\Delta$ 11(13) reductase; ALDH1 - aldehyde dehydrogenase. MVA pathway: HMGS - 3-hydroxy-3-methylglutaryl-CoA synthase; HMGR - 3-hydroxy-3-methylglutaryl-CoA reductase; MK - mevalonate kinase; MPK - mevalonate 5-phosphate kinase; MDC - mevalonate 5-diphosphate decarboxylase; IPPi - isopentenyl diphosphate isomerase; FPPS, farnesyl diphosphate synthase. Artemisinin biosynthesis genes cloned in p1240 vector are shown in red.

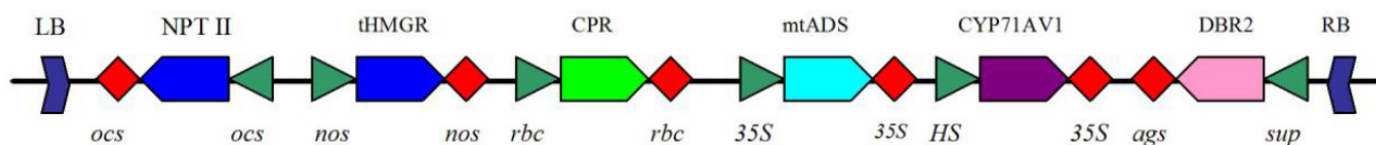

**Figure S2.** Schematic depiction of the expression cassette of vector p1240 to artemisinin production in chrysanthemum. tHMGR: 3-hydroxy-3-methylglutaryl-coenzyme A reductase, CPR: cytochrome P450 reductase, ADS: mitochondria tar-

geted amorpho-4,11-diene synthase, CYP71AV1: amorpho-4,11-diene monooxygenase, DBR2: artemisinic aldehyde  $\Delta$ 11(13) reductase. Green triangles indicate promoters, red rhombus - terminators; ocs: octopine synthase; nos: nopaline synthase; rbc: rubisco; 35S: cauliflower mosaic virus (CaMV) 35S; HS: hps18.1 promoter; sup: superpromoter; ags: agrocinopine synthase. LB and RB: left and right T-DNA borders, respectively.

**Table S1.** PCR regimes and nucleotide sequences of used primers.

| Target Gene                   | Primer Sequence, 5′ → 3′         | Sequence Annealing    | Amplified Fragment, bp | Annealing Temperature, °C | Extension Time, sec |
|-------------------------------|----------------------------------|-----------------------|------------------------|---------------------------|---------------------|
| PCR                           |                                  |                       |                        |                           |                     |
| mtADS                         | F ctatccttcgcaagacccttcc         | 35S CaMV promoter     | 591                    | 55                        | 40                  |
|                               | R tgatcaatctccggttcaaagtga       | ADS                   |                        |                           |                     |
| DBR2                          | F gctggtaaatccattgcttttga        | Sup promoter          | 931                    | 61                        | 60                  |
|                               | R caggatacgtgccatagggttgcata     | DBR2                  |                        |                           |                     |
| CPR                           | F atgcaatcaacaactccgtaagttat     | CPR gene, full-length | 2115                   | 60                        | 120                 |
|                               | R ttaccatacatcacggagatatcttcc    |                       |                        |                           |                     |
| tHMGR                         | F acacctaataagtccaacatgg         | tHMGR                 | 1011                   | 56                        | 60                  |
|                               | R tgatactacgagagcggttg           |                       |                        |                           |                     |
| CYP71AV1                      | F atgaagagtatactaaaagcaatggcactc | CYP71AV1              | 1488                   | 60                        | 90                  |
|                               | R ctagaaacttggaacgagtaacaactca   |                       |                        |                           |                     |
| RT-PCR                        |                                  |                       |                        |                           |                     |
| ADS                           | F ggaagagctcagccatgtgt           | mtADS                 | 496                    | 60                        | 20                  |
|                               | R caggtagcaccgccagtaa            |                       |                        |                           |                     |
| tHMGR                         | F gcctataacaccaacgggca           | tHMGR                 | 229                    | 60                        | 20                  |
|                               | R cgctgccttggttattcacg           |                       |                        |                           |                     |
| CYP71AV1                      | F accctccactacccttggtt           | CYP71AV1              | 242                    | 60                        | 20                  |
|                               | R ggctccaggacacatccttc           |                       |                        |                           |                     |
| CPR                           | F gtggagactggggctctttc           | CPR                   | 154                    | 60                        | 20                  |
|                               | R ctttggcatcaccgcaaaca           |                       |                        |                           |                     |
| DBR2                          | F aaccacgttacacggctgat           | DBR2                  | 136                    | 60                        | 20                  |
|                               | R ctagtgttaaccaccgcagca          |                       |                        |                           |                     |
| Actin of <i>C. morifolium</i> | F tggacgtgacttgaccgatg           | actin                 | 228                    | 60                        | 20                  |
|                               | R cacctgaacctctcagcacc           |                       |                        |                           |                     |

F- forward primer, R- reverse primer

PCR amplification of the target fragments was performed using DreamTaq polymerase (Thermo Fisher Scientific, USA) in a manufacturer recommended buffer. The reaction mix contained genomic DNA (200 ng), forward and reverse primers (0.5  $\mu$ M each) and 1.0 U DreamTaq polymerase in total volume of 25  $\mu$ L. The reaction was performed under the following conditions: initial denaturation in 95°C 5 min, denaturation was carried out by 94°C 30 s, primer annealing in temperature described in the table, 30 s and extension at 72°C in the extension time in the table with 32 cycles.

First strand cDNA synthesis for RT-PCR analysis was performed using M-MuLV reverse transcriptase (Thermo Fisher Scientific, USA) in a manufacturer recommended buffer. The three microgram of the total RNA and 100 pmol of oligo d(T)<sub>16</sub> primer were added into reaction buffer and first incubated at 42° C 90 min. Amplification of the target fragments was performed using DreamTaq polymerase (Thermo Fisher Scientific, USA) in a manufacturer recommended buffer. The reaction mix contained of 2  $\mu$ L of the RT reaction mix, forward and reverse primers (0.5  $\mu$ M each) and 1.0 U DreamTaq polymerase in total volume of 25  $\mu$ L. The reaction was performed under the following conditions: initial denaturation in 95° C 5 min, denaturation was carried out by 94° C 30 s, primer annealing at 60° C 30 s and extension at 72°C in the extension time in the table with 35 cycles.

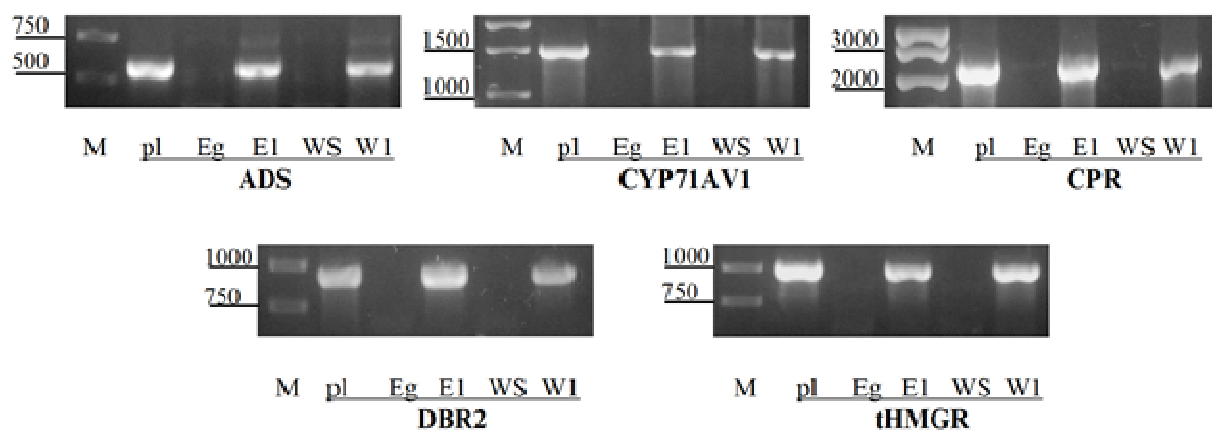

**Figure S3.** PCR analysis of transgenic chrysanthemum lines. Eg and WS: non-transformed plants cvs. Egyptianka and White Snowdon, respectively, negative control; E1 and WS1: transgenic lines cvs. Egyptianka and White Snowdon, respectively. ADS: amorpho-4,11-diene synthase (the expected amplified fragment length is 591 bp); CYP71AV1: amorpho-4,11-diene monooxygenase (1488 bp); CPR: cytochromeP450 reductase (2115 bp); DBR2: artemisinic aldehyde  $\Delta$ 11(13) reductase (931 bp); tHMGR:3-hydroxy-3-methylglutaryl-coenzyme A reductase (1011 bp). pl: DNA of plasmid p1240, positive control. M: molecular size marker.
